# Supplementary material for: Black Carbon and Its Effect on Carbon Sequestration in Soil
Source: MDPI journal article supplement (doi:10.3390/agronomy11112261), 2021-11-09
Supplement: s1 [file s1]

**Table S1.** Basic descriptive statistics.

|                                                           | A   | BC          | fLFOM/oL-FOM | DFOM        | WSM            | CEC            | pHKCl       | Particles <0,01 mm | C <sub>org</sub> | MCC          | DSS          | SW          | BD          |
|-----------------------------------------------------------|-----|-------------|--------------|-------------|----------------|----------------|-------------|--------------------|------------------|--------------|--------------|-------------|-------------|
| Locality (GPS coordinates)                                |     | Average±SD  | Average±SD   | Average±SD  | Average±SD     | Average±SD     | Average±SD  | Average±SD         | Average±SD       | Average±SD   | Average±SD   | Average±SD  | Average±SD  |
| Overall                                                   |     | 2.458±0.488 | 0.369±0.063  | 0.324±0.197 | 267.225±37.976 | 154.008±28.867 | 5.711±0.383 | 37.117±4.589       | 2.885±0.301      | 36.226±0.954 | 57.462±9.135 | 2.600±0.067 | 1.301±0.115 |
| Křišťanov ( <a href="#">48.908306 N, 14.022519 E</a> )    | No  | 2.407±0.015 | 0.455±0.021  | 0.410±0.009 | 307.667±8.595  | 162.500±5.683  | 5.238±0.044 | 32.167±1.169       | 3.267±0.054      | 35.152±0.076 | 42.900±0.518 | 2.537±0.020 | 1.127±0.020 |
| Záhvozdí (48.835042 N, 13.957061 E)                       | No  | 2.092±0.052 | 0.323±0.016  | 0.285±0.010 | 279.000±13.023 | 149.167±6.369  | 5.793±0.039 | 40.833±2.137       | 3.082±0.041      | 36.937±0.091 | 45.667±0.137 | 2.582±0.028 | 1.375±0.019 |
| Slavkov (48.765456 N, 14.249271 E)                        | No  | 2.102±0.021 | 0.387±0.024  | 0.320±0.009 | 294.500±10.015 | 158.500±8.456  | 5.127±0.034 | 42.833±1.835       | 3.177±0.106      | 37.497±0.040 | 57.117±0.117 | 2.505±0.016 | 1.403±0.036 |
| Malšín ( <a href="#">48.678958 N, 14.290926 E</a> )       | No  | 1.910±0.029 | 0.377±0.018  | 0.197±0.008 | 240.000±13.971 | 138.667±7.174  | 5.497±0.107 | 37.500±1.378       | 2.817±0.046      | 35.577±0.103 | 52.767±0.242 | 2.627±0.039 | 1.373±0.019 |
| Jaroměř ( <a href="#">48.696089 N, 14.539593 E</a> )      | No  | 2.693±0.016 | 0.472±0.029  | 0.450±0.009 | 331.667±10.801 | 179.167±7.574  | 6.097±0.135 | 32.333±1.633       | 3.345±0.042      | 34.928±0.110 | 60.167±0.266 | 2.597±0.031 | 1.150±0.020 |
| Malonty (48.689106 N, 14.593298 E)                        | No  | 2.402±0.015 | 0.403±0.010  | 0.318±0.008 | 307.500±4.087  | 171.667±3.933  | 5.938±0.105 | 36.167±2.137       | 3.183±0.069      | 35.443±0.040 | 57.300±4.266 | 2.655±0.018 | 1.235±0.027 |
| Pohorská ves ( <a href="#">48.671740 N, 14.652090 E</a> ) | No  | 1.993±0.043 | 0.390±0.020  | 0.202±0.012 | 287.000±14.980 | 161.500±13.323 | 5.252±0.099 | 31.833±1.472       | 2.935±0.080      | 35.275±0.067 | 51.183±0.117 | 2.610±0.023 | 1.112±0.047 |
| Paseky (48.739815 N, 14.749206 E)                         | No  | 1.708±0.026 | 0.393±0.018  | 0.212±0.010 | 252.333±14.010 | 247.667±6.831  | 5.128±0.041 | 44.167±1.329       | 2.717±0.048      | 37.835±0.113 | 44.683±0.147 | 2.703±0.058 | 1.440±0.022 |
| Hartunkov (48.737423 N, 14.668757 E)                      | No  | 1.787±0.036 | 0.393±0.019  | 0.253±0.103 | 247.333±9.048  | 155.000±6.099  | 5.527±0.079 | 32.667±1.033       | 2.988±0.063      | 35.717±0.048 | 44.750±0.105 | 2.645±0.024 | 1.217±0.018 |
| Rychnov (48.757090 N, 14.683101 E)                        | No  | 2.502±0.015 | 0.505±0.010  | 0.417±0.012 | 287.833±11.462 | 169.667±4.320  | 5.540±0.075 | 39.333±1.633       | 3.020±0.111      | 36.895±0.069 | 50.067±0.432 | 2.697±0.036 | 1.295±0.010 |
| Tábor (49.416135 N, 14.713877 E)                          | Yes | 2.403±0.027 | 0.302±0.018  | 0.325±0.010 | 260.833±11.703 | 143.000±4.690  | 6.198±0.047 | 43.000±2.280       | 2.803±0.036      | 37.392±0.033 | 64.267±0.186 | 2.573±0.036 | 1.393±0.016 |
| Písek (49.319750 N, 14.210609 E)                          | Yes | 2.107±0.022 | 0.290±0.014  | 0.383±0.021 | 239.833±7.834  | 129.167±4.355  | 6.507±0.034 | 38.000±0.894       | 2.660±0.073      | 37.073±0.073 | 69.600±0.126 | 2.587±0.016 | 1.352±0.013 |

|                                                                 |     |             |             |             |                |               |             |              |             |              |              |             |             |
|-----------------------------------------------------------------|-----|-------------|-------------|-------------|----------------|---------------|-------------|--------------|-------------|--------------|--------------|-------------|-------------|
| Strakonice ( <a href="#">49.264034 N, 13.935478 E</a> )         | Yes | 2.115±0.027 | 0.347±0.016 | 0.203±0.010 | 215.667±10.424 | 119.667±8.454 | 5.782±0.075 | 32.167±0.753 | 2.342±0.049 | 36.453±0.079 | 58.817±0.354 | 2.583±0.027 | 1.195±0.010 |
| Prachatice (49.011102 N, 14.017012 E)                           | Yes | 2.997±0.062 | 0.418±0.008 | 0.262±0.010 | 278.500±11.415 | 134.000±2.966 | 5.513±0.056 | 31.000±1.265 | 2.702±0.046 | 35.043±0.110 | 51.683±0.319 | 2.518±0.008 | 1.102±0.041 |
| České Budějovice 1 (48.992662 N, 14.498712 E)                   | Yes | 3.223±0.028 | 0.327±0.019 | 0.350±0.006 | 287.500±9.203  | 148.000±5.020 | 5.892±0.034 | 40.500±2.074 | 2.897±0.069 | 37.138±0.041 | 60.317±0.172 | 2.540±0.032 | 1.425±0.015 |
| České Budějovice 2 (48.974556 N, 14.523650 E)                   | Yes | 2.793±0.014 | 0.290±0.013 | 0.197±0.014 | 198.333±10.520 | 130.333±2.338 | 5.688±0.054 | 43.333±1.633 | 2.472±0.127 | 37.517±0.027 | 61.350±0.138 | 2.567±0.029 | 1.448±0.010 |
| České Budějovice 3 ( <a href="#">48.985139 N, 14.531457 E</a> ) | Yes | 2.815±0.010 | 0.322±0.013 | 0.225±0.014 | 189.833±6.853  | 118.000±3.899 | 6.012±0.111 | 38.000±1.414 | 2.288±0.082 | 35.685±0.021 | 70.583±0.214 | 2.500±0.018 | 1.353±0.018 |
| Český Krumlov 1 ( <a href="#">48.820521 N, 14.334308 E</a> )    | Yes | 3.097±0.024 | 0.297±0.015 | 0.303±0.015 | 265.667±12.925 | 129.667±7.633 | 5.688±0.040 | 32.667±1.033 | 2.912±0.076 | 35.230±0.020 | 68.300±0.276 | 2.673±0.033 | 1.313±0.035 |
| Český Krumlov 2 ( <a href="#">48.810069 N, 14.338973 E</a> )    | Yes | 3.503±0.049 | 0.307±0.014 | 0.440±0.014 | 304.500±11.811 | 179.500±6.317 | 5.525±0.068 | 34.500±1.049 | 3.290±0.029 | 35.547±0.058 | 64.517±0.117 | 2.615±0.026 | 1.322±0.012 |
| Jindřichův Hradec (49.157802 N, 15.051820 E)                    | Yes | 2.508±0.036 | 0.377±0.022 | 0.395±0.010 | 269.000±11.314 | 155.333±5.317 | 6.270±0.081 | 39.333±1.862 | 2.813±0.053 | 36.190±0.063 | 73.200±0.141 | 2.678±0.048 | 1.392±0.016 |

Note: A—Assumption of higher black carbon deposition; BC—black carbon (% C<sub>org</sub>); fLFOM/oLFOM—the ratio of free light fraction and the occluded light fraction of soil organic matter; DFOM—the organic matter of the heavy soil fraction (% C of soil); WSM—water-stable macroaggregates [g aggregates·(kg soil after sand subtraction)<sup>-1</sup>]; CEC—cation exchange capacity (mmol/kg); pH<sub>KCl</sub>—soil reaction; Particles <0.01 mm—clay particles (%); C<sub>org</sub>—soil organic carbon (%); MCC—maximal capillary capacity (%); DSS—degree of sorption saturation (%); SW—specific weight (g/cm<sup>3</sup>); BD—bulk density (g/cm<sup>3</sup>)

2  
3  
4  
5  
6
