# Supplementary material for: Black Carbon and Its Effect on Carbon Sequestration in Soil
Source: MDPI journal article supplement (doi:10.3390/agronomy11112261), 2021-11-09
Supplement: s1 [file s1]

**Figure S1.** The map of sampling localities (South Bohemia, Czech Republic).

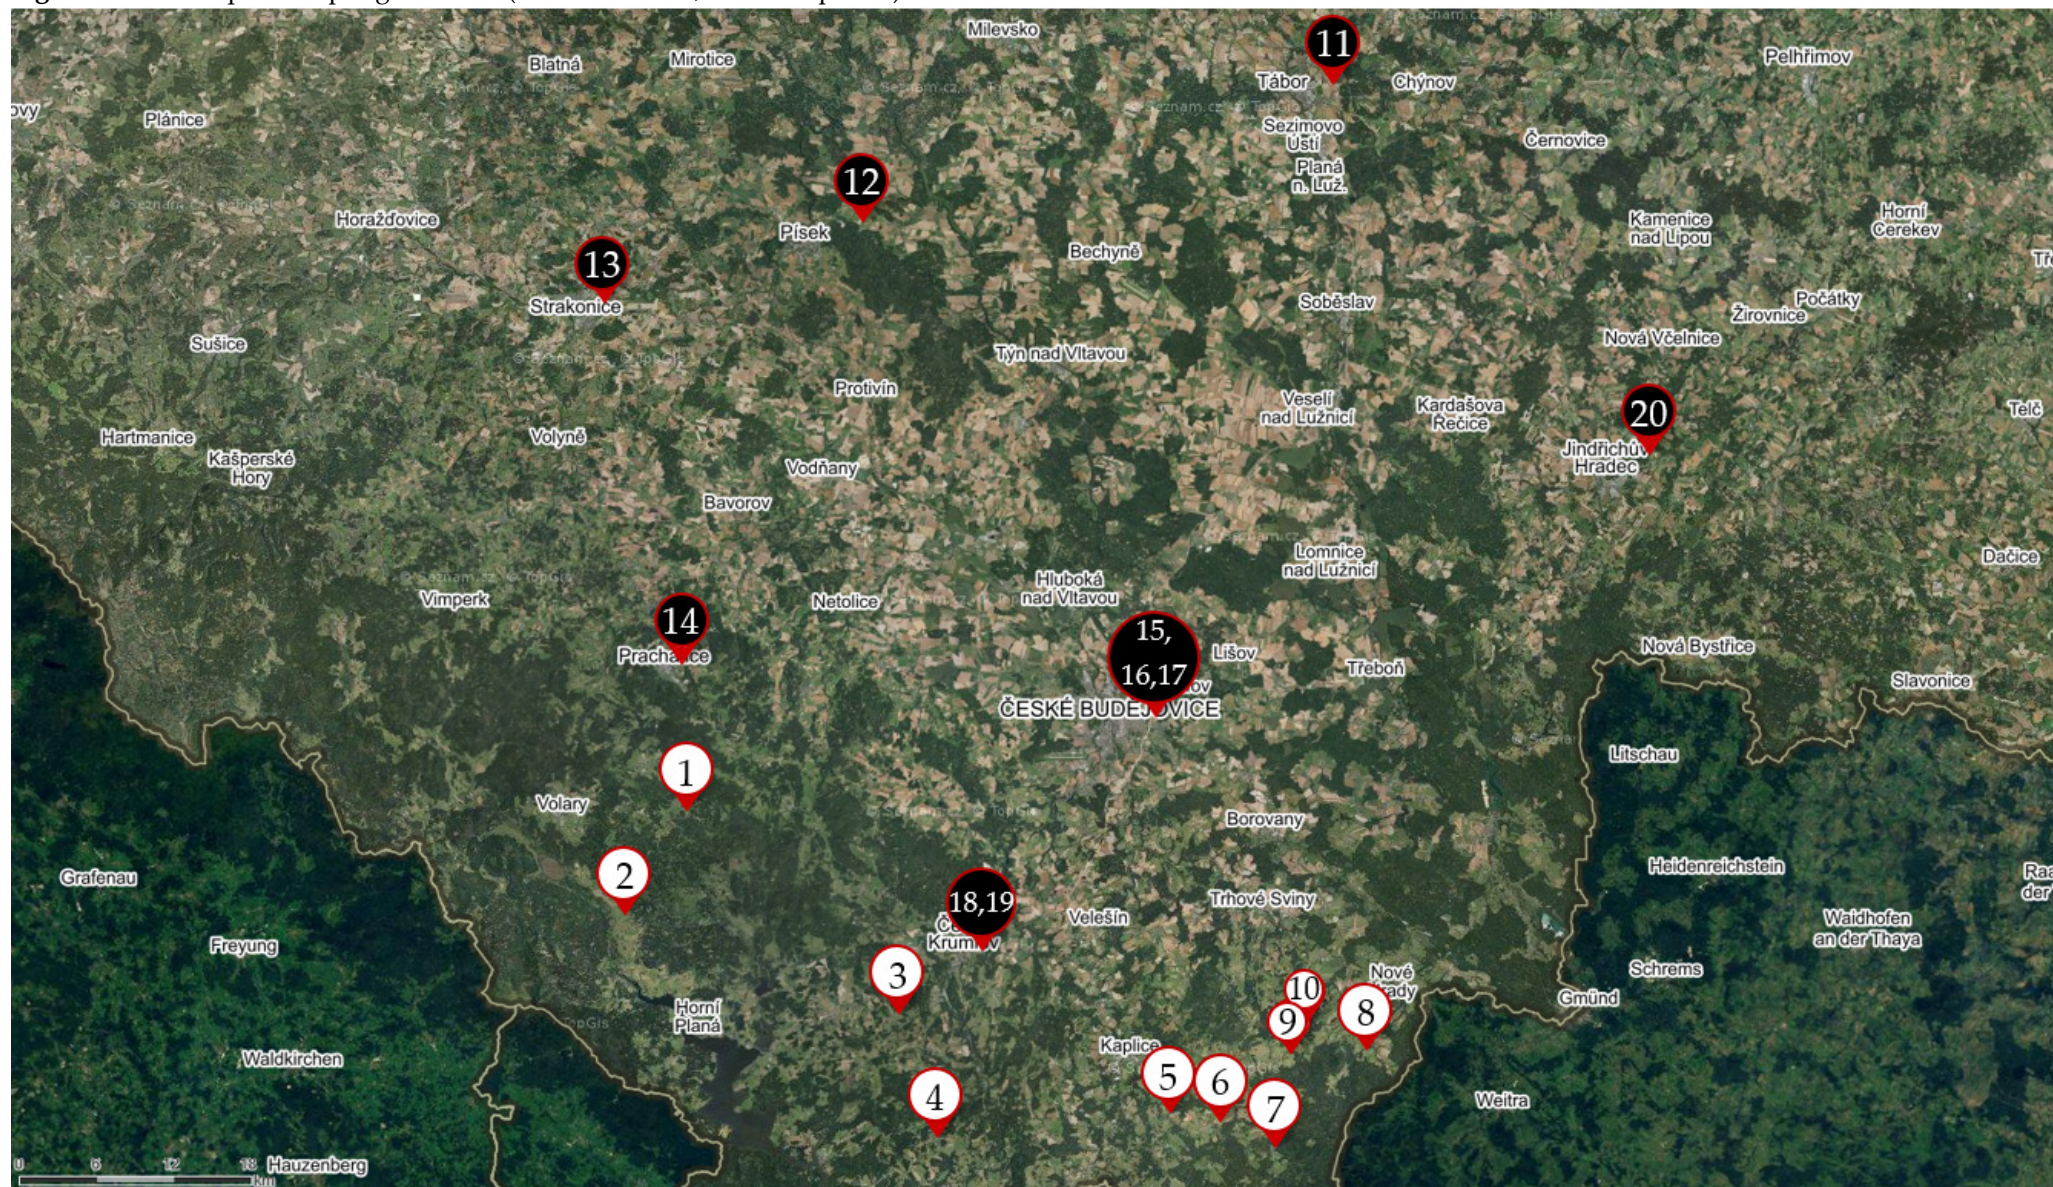

---

Note: 1—Křišťanov; 2—Záhvozí; 3—Slavkov; 4—Malšín; 5—Jaroměř; 6—Malonty; 7—Pohorská ves; 8—Paseky; 9—Hartunkov; 10—Rychnov; 11—Tábor; 12—Písek; 13—Strakonice; 14—Prachatice; 15—České Budějovice 1; 16—České Budějovice 2; 17—České Budějovice 3; 18—Český Krumlov 1; 19—Český Krumlov 2; 20—Jindřichův Hradec. The source of the map background is the Mapy.cz website.
